# Supplementary material for: Technical note: Nikon–TRACK Flow , a new versatile microscope system for fission track analysis
Source: Copernicus journal article supplement (doi:10.5194/gchron-2-93-2020), 2020-04-23

## Nikon-TRACK*Flow*CHART

This flowchart represents the different scanning options for the Nikon-TRACKflow system. Illustrations are provided in the boxes to provide a visual indication of what the operator is presented with at the time. Boxes with a green border represent dialogs that require operator interaction.

Scanning protocols are illustrated using colour coding signage for navigation. Due to the different options the operator can choose in the wizard (Protocol parameters), navigation lines branch. To guide the user, two types of discrimination occur in the chart. The first order of differentiation between different paths of the same protocol is given by symbology (dashed and dotted lines), explained before the protocol box. The second order of differentiation is given by 'switches' on the line. The active parameter of is mentioned at each switch box. As such it is illustrated clearly where in the protocol each parameter determines what happens.

We chose to represent loops inside the protocols by adding symbols at the beginning and end of each loop, analogous to portals with an entrance and exit of each loop. For example, if a protocol line passes the entrance symbol of loop 1, everything after this symbol will be revisited in the following loops. When the line passes the exit symbol of loop 1, the protocol returns to the entrance of loop 1. This repeats until the loop was repeated for each well. If two 'entrance symbols' are passed, the first applies. Once a loop is finished, it is never revisited.

Line colours generated with ColourBrewer 2.0.

Table S1. Protocol parameters

|                                              | EDM_s  | EDM_m  | LAFT   | LSC | GL     |
|----------------------------------------------|--------|--------|--------|-----|--------|
| Mount type: (Thick / thin)                   |        |        | X      | X   |        |
| Mode: (Single / Wellplate)                   |        |        |        | X   | X      |
| Storage type (Single / Separate files)       |        |        | X      | X   | X      |
| Autofind                                     |        |        |        | X   |        |
| Automatic inspection                         |        |        |        | X   | X      |
| Image points (Enabled / Disabled)            | X      |        | X      | X   | X      |
| EDM                                          |        |        |        | X   |        |
| Objective (100x / 50x)                       | X      | X      | X      | X   | X      |
| E-mail notification                          | X      | X      | X      | X   | X      |
| Scout                                        | X      | X      | X      |     |        |
| Enable fine calibration                      | X      | X      |        |     |        |
| Autoselect fine calibration points           | X      | X      |        |     |        |
| N (fine) calibration / recoordination points | 3 - 10 | 3 - 10 | 3 - 10 |     | 2 - 10 |
| Scanning time (First scan / Rescan)          |        |        |        |     | X      |
| Recoordination mark type (Cu grid / Other)   |        |        | X      |     |        |

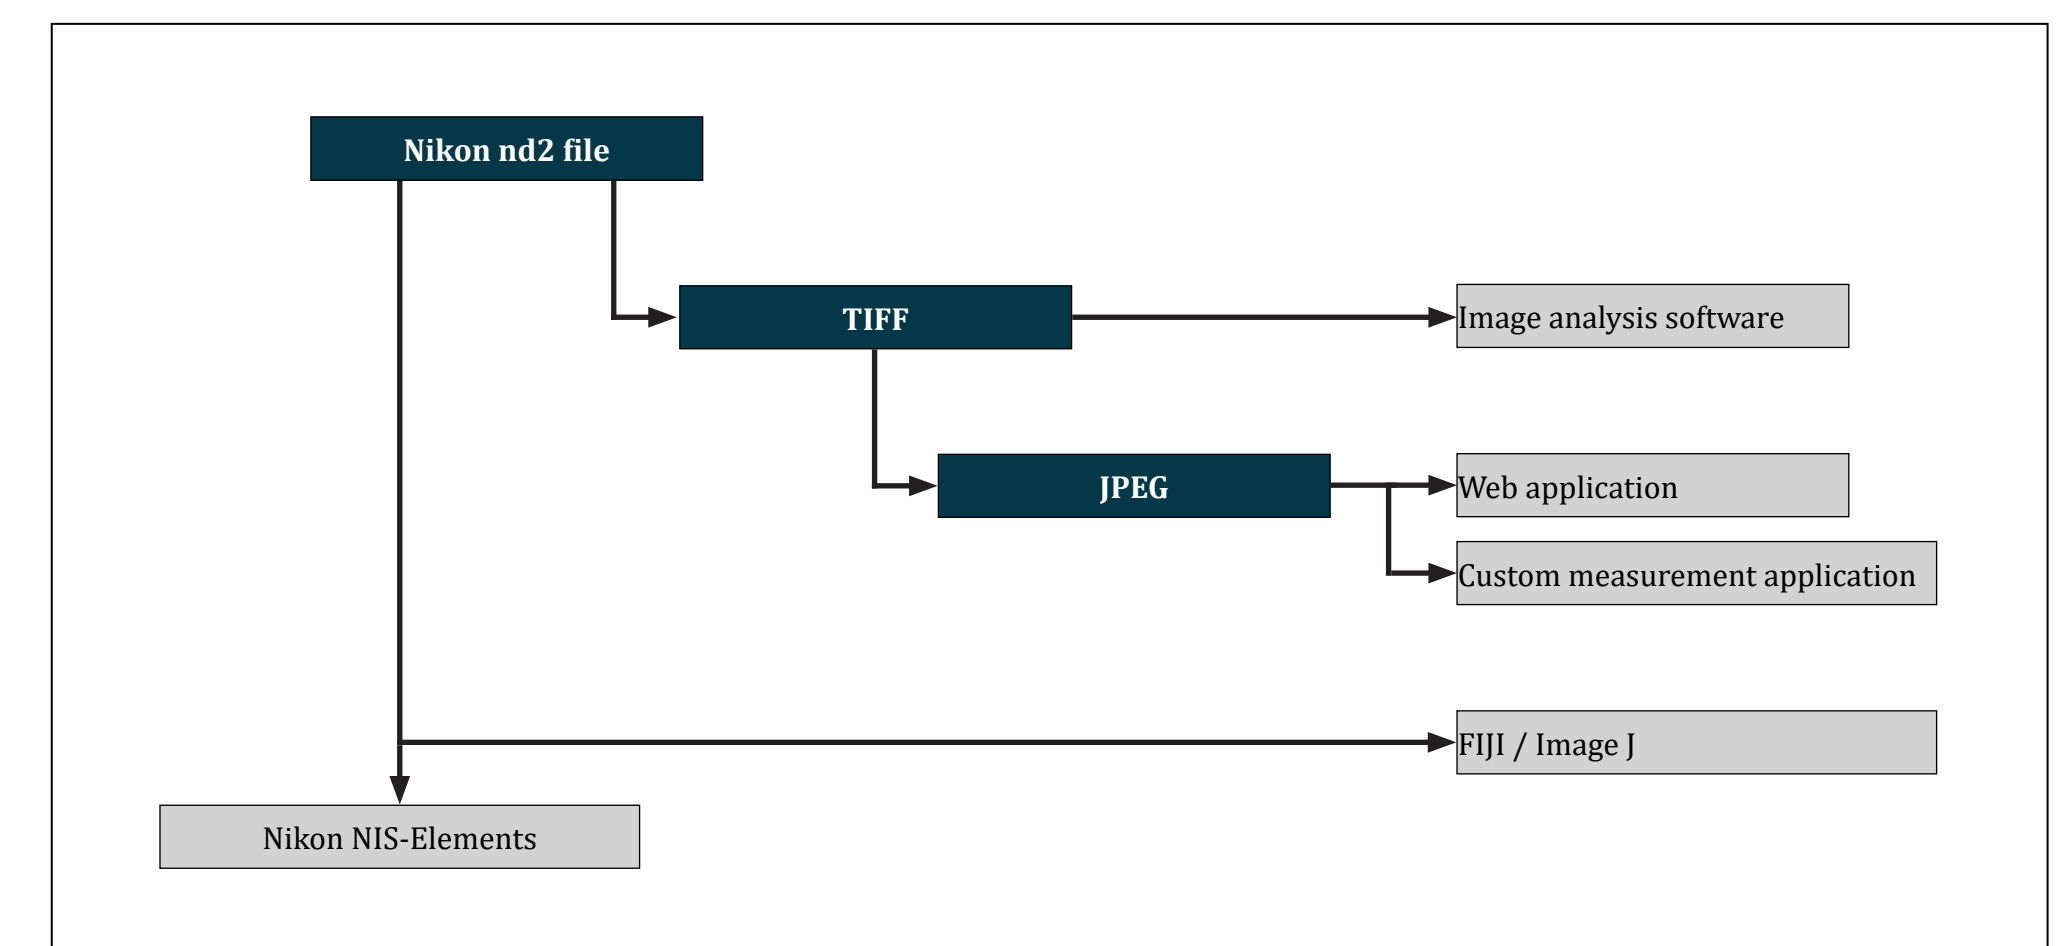

Figure S2. Options for analysis and export

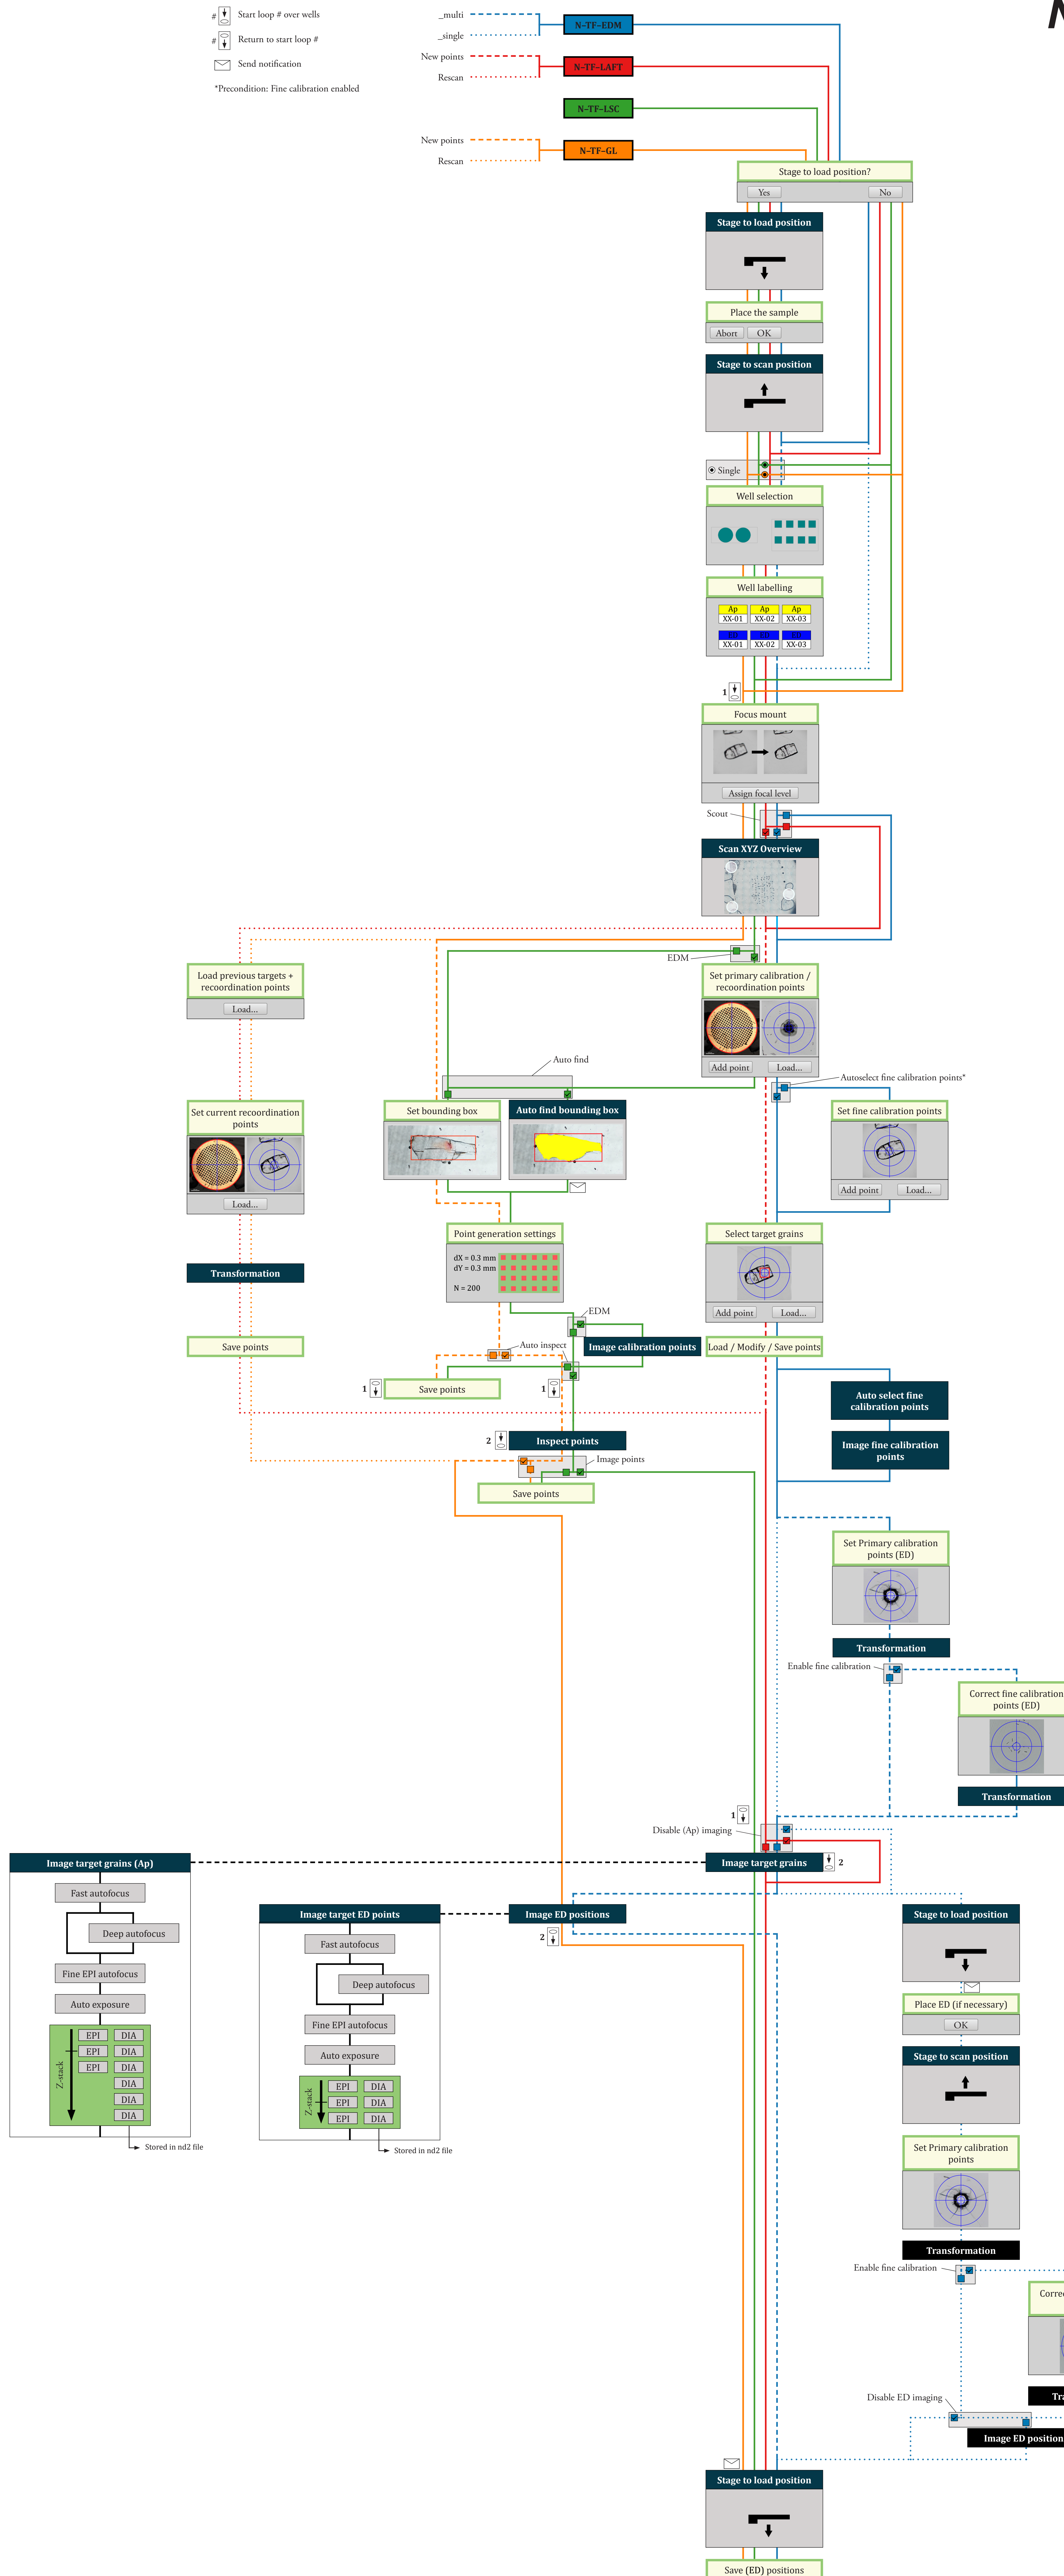

Supplement: Supplementary file 3 [file gchron-2-93-2020-supplement.zip]
