# Supplementary material for: Technical note: Nikon–TRACK Flow , a new versatile microscope system for fission track analysis
Source: Copernicus journal article supplement (doi:10.5194/gchron-2-93-2020), 2020-04-23
Supplement: Supplementary file 1 [file gchron-2-93-2020-supplement.zip]

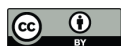

*Supplement of*

## **Technical note: Nikon–TRACKFlow, a new versatile microscope system for fission track analysis**

**Gerben Van Ranst et al.**

*Correspondence to:* Gerben Van Ranst ([gerben.vanranst@ugent.be](mailto:gerben.vanranst@ugent.be))

- [gchron-2-93-2020-supplement-title-page.pdf](#)
- [Supplement\\_1.pdf](#)
- [Supplement\\_2.pdf](#)

The copyright of individual parts of the supplement might differ from the CC BY 4.0 License.
