# Supplementary material for: Technical note: Nikon–TRACK Flow , a new versatile microscope system for fission track analysis
Source: Copernicus journal article supplement (doi:10.5194/gchron-2-93-2020), 2020-04-23
Supplement: Supplementary file 4 [file gchron-2-93-2020-supplement.zip]

Archive with 3 entries (3 files):
- gchron-2-93-2020-supplement-title-page.pdf
- Supplement_2.pdf
- Supplement_1.pdf
